# Supplementary material for: New insights on the predisposing factors and geomorphic response to the largest landslide on emerged Earth surface: the Seymareh rock slide - debris avalanche (Zagros Mts., Iran)
Source: Copernicus journal article supplement (doi:10.5194/esurf-2018-91), 2019-01-29
Supplement: Supplementary file 1 [file esurf-2018-91-supplement.pdf]

# **New insights on the predisposing factors and geomorphic response to the largest landslide on emerged Earth surface: the Seymareh rock slide - debris avalanche (Zagros Mts., Iran)**

Michele Delchiaro<sup>1</sup>, Marta Della Seta<sup>1</sup>, Salvatore Martino<sup>1</sup>, Maryam Dehbozorgi<sup>2</sup>, Reza Nozaem<sup>3</sup>

5

<sup>1</sup>Department of Earth Sciences, Sapienza University of Rome, Rome, Italy

<sup>2</sup>Department of Earth Science, Kharazmi University, Tehran, Iran

<sup>3</sup>School of Geology, College of Science, University of Tehran, Iran

*Correspondence to:* Michele Delchiaro ([michele.delchiaro@uniroma1.it](mailto:michele.delchiaro@uniroma1.it))

10

## **Supplementary material – OSL sample details**

15

20

25

30

Sample No. **SEY3**

Sample Location (lat. and long required, country, state, county optional)

**LAT: 32° 59.591'N; LONG: 47° 46.144'E – WESTERN IRAN**

Sample depositional environment (e.g. eolian-medium sand, alluvial fan):

5 **SANDY-GRAVELLY ALLUVIAL DEPOSIT. WE SAMPLED A SANDY LAYER**

Stratigraphic and/or geomorphic context, sketch below (or attach photo):

**TERRACED ALLUVIAL DEPOSIT (LEVEL 2 OF 4 – same terrace sequence of SEY10 and SEY11)**

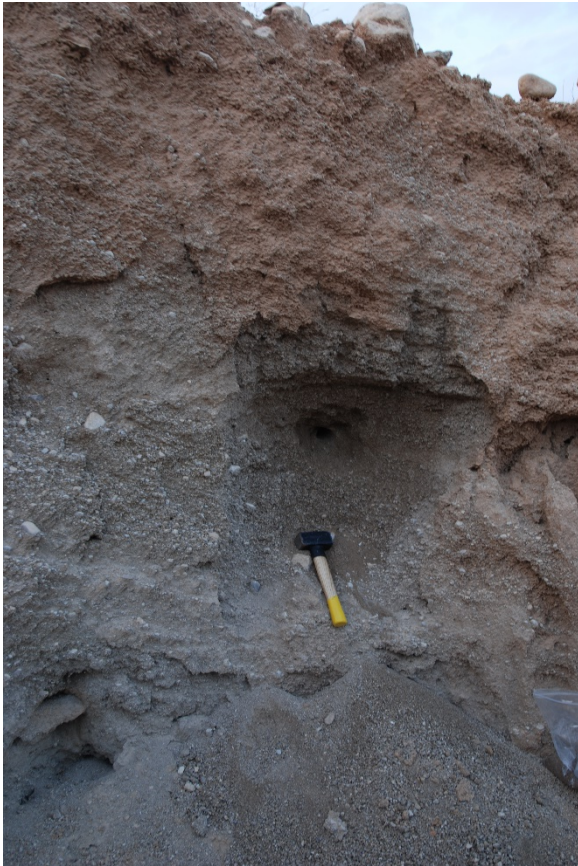

Estimate of burial moisture content:

10 **The one expected for an alluvial deposit in arid climate**

Elevation (meters above sea level)

**485 m a.s.l.**

Burial depth (meters from surface)

**~ 1.5 m**

15

Sample No. **SEY4**

Sample Location (lat. and long required, country, state, county optional)

**LAT: 33° 13.197'N; LONG: 47° 18.382'E – WESTERN IRAN**

Sample depositional environment (e.g. eolian-medium sand, alluvial fan):

5 **VARVED LACUSTRINE DEPOSIT.**

Stratigraphic and/or geomorphic context, sketch below (or attach photo):

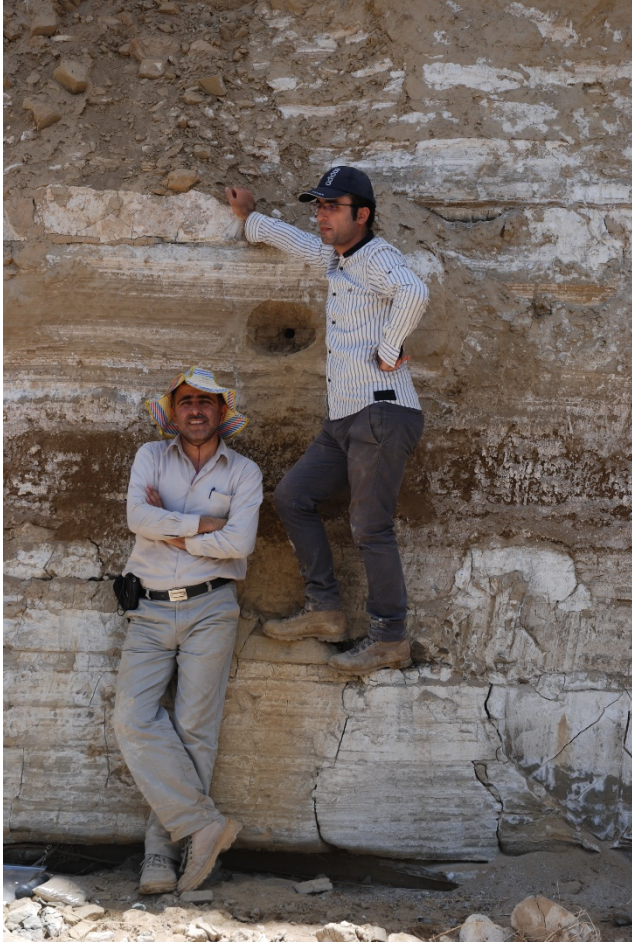

Estimate of burial moisture content:

10 **The one expected for a lacustrine deposit in arid climate**

Elevation (meters above sea level)

**590 m a.s.l.**

Burial depth (meters from surface)

**~ 25 m**

Sample No. **SEY5**

Sample Location (lat. and long required, country, state, county optional)

**LAT: 33° 13.437'N; LONG: 47° 18.219'E – WESTERN IRAN**

Sample depositional environment (e.g. eolian-medium sand, alluvial fan):

5 **ALLUVIAL PLAIN DEPOSIT. WE SAMPLED A SANDY LAYER.**

Stratigraphic and/or geomorphic context, sketch below (or attach photo):

**TERRACED ALLUVIAL DEPOSIT (LEVEL 1 OF 3 – same sequence of SEY6 and SEY8)**

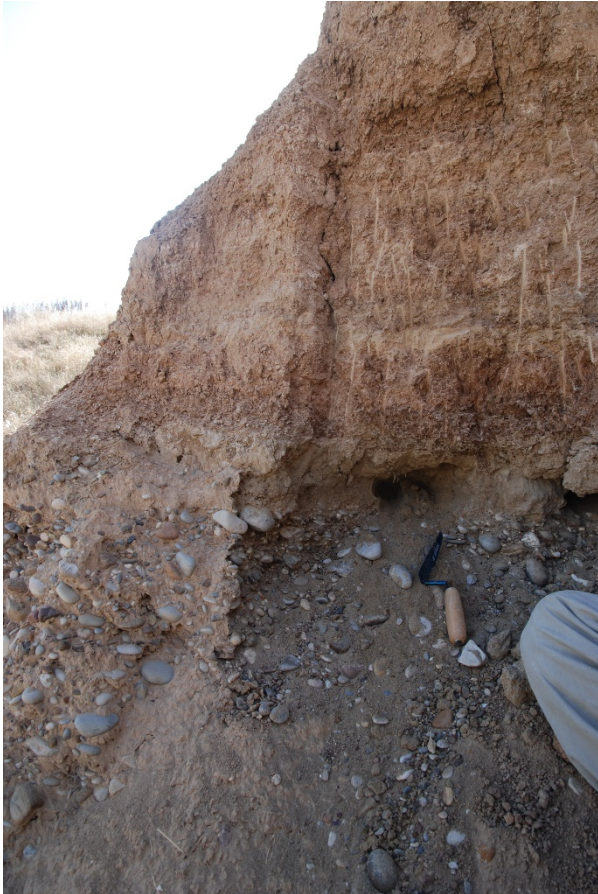

10 Estimate of burial moisture content:

**The one expected for an alluvial deposit in arid climate**

Elevation (meters above sea level)

**607 m a.s.l.**

Burial depth (meters from surface)

15 **~ 1.5 m**

Sample No. **SEY6**

Sample Location (lat. and long required, country, state, county optional)

**LAT: 33° 13.291'N; LONG: 47° 18.358'E – WESTERN IRAN**

Sample depositional environment (e.g. eolian-medium sand, alluvial fan):

5 **ALLUVIAL PLAIN DEPOSIT. WE SAMPLED A SANDY LAYER.**

Stratigraphic and/or geomorphic context, sketch below (or attach photo):

**TERRACED ALLUVIAL DEPOSIT (LEVEL 3 OF 3 – same terrace sequence of SEY5 and SEY8)**

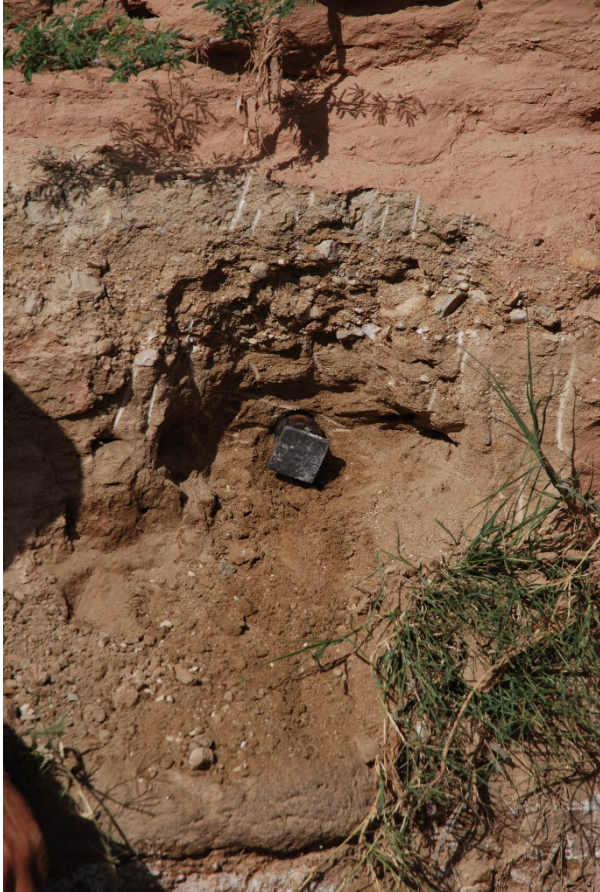

10 Estimate of burial moisture content:

**The one expected for an alluvial deposit in arid climate**

Elevation (meters above sea level)

**587 m a.s.l.**

Burial depth (meters from surface)

15 **~ 5 m**

Sample No. **SEY8**

Sample Location (lat. and long required, country, state, county optional)

**LAT: 33° 7.402'N; LONG: 47° 28.795'E – WESTERN IRAN**

Sample depositional environment (e.g. eolian-medium sand, alluvial fan):

5 **SANDY-GRAVELLY ALLUVIAL PLAIN DEPOSIT. WE SAMPLED A SANDY LAYER**

Stratigraphic and/or geomorphic context, sketch below (or attach photo):

**TERRACED ALLUVIAL DEPOSIT (LEVEL 2 OF 3 – same sequence of SEY5 and SEY6)**

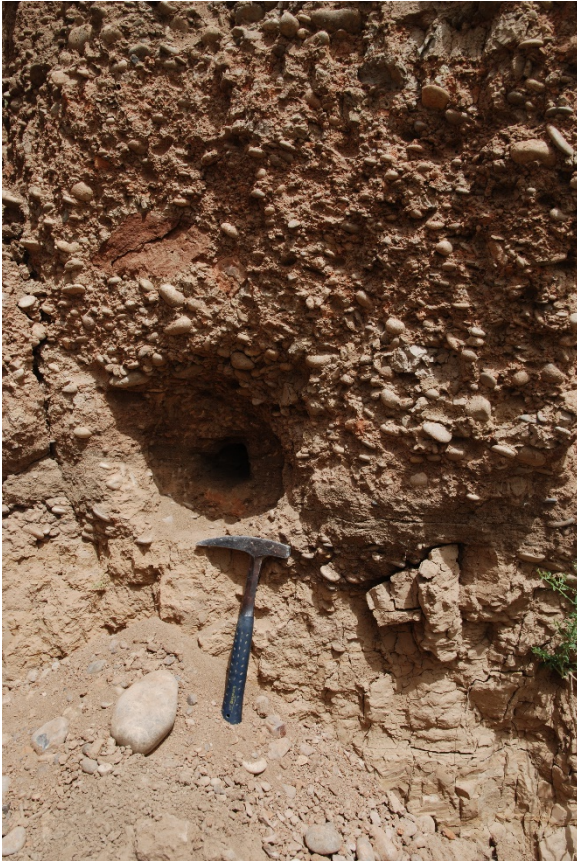

10

Estimate of burial moisture content:

**The one expected for an alluvial deposit in arid climate**

Elevation (meters above sea level)

**561 m a.s.l.**

15 Burial depth (meters from surface)

**~ 2.5 m**

Sample No. **SEY9**

Sample Location (lat. and long required, country, state, county optional)

**LAT: 33° 4.462'N; LONG: 47° 34.197'E – WESTERN IRAN**

Sample depositional environment (e.g. eolian-medium sand, alluvial fan):

5 **SANDY-GRAVELLY ALLUVIAL DEPOSIT. WE SAMPLED A SANDY LAYER**

Stratigraphic and/or geomorphic context, sketch below (or attach photo):

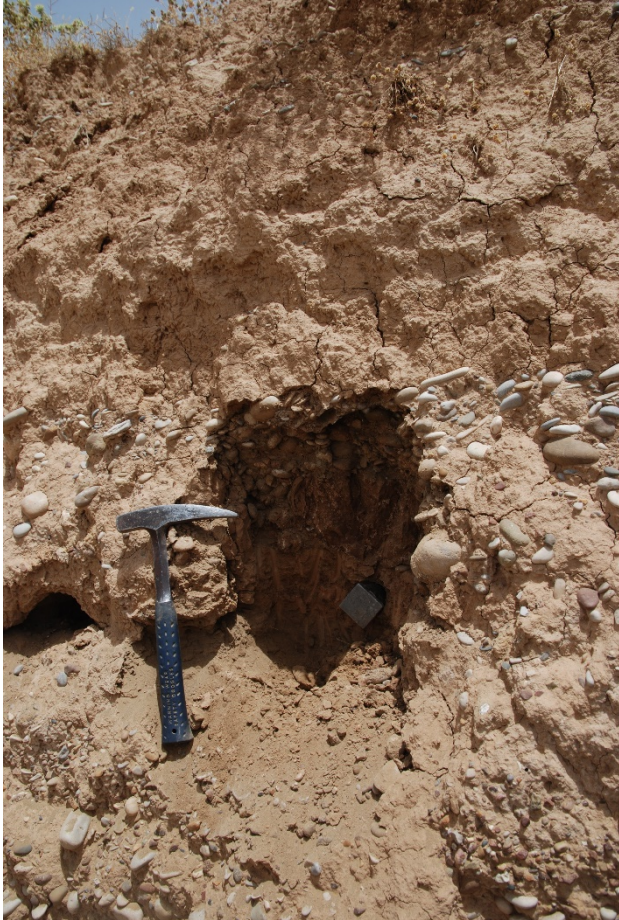

Estimate of burial moisture content:

10 **The one expected for an alluvial deposit in arid climate**

Elevation (meters above sea level)

**570 m a.s.l.**

Burial depth (meters from surface)

**~ 1.5 m**

Sample No. **SEY10**

Sample Location (lat. and long required, country, state, county optional)

**LAT: 32° 59.335'N; LONG: 47° 46.071'E – WESTERN IRAN**

Sample depositional environment (e.g. eolian-medium sand, alluvial fan):

5 **SANDY-GRAVELLY-CONGLOMERATIC ALLUVIAL PLAIN DEPOSIT. WE SAMPLED A SANDY LAYER**

Stratigraphic and/or geomorphic context, sketch below (or attach photo):

**TERRACED ALLUVIAL DEPOSIT (LEVEL 3 OF 4 - same sequence as SEY3 and SEY11)**

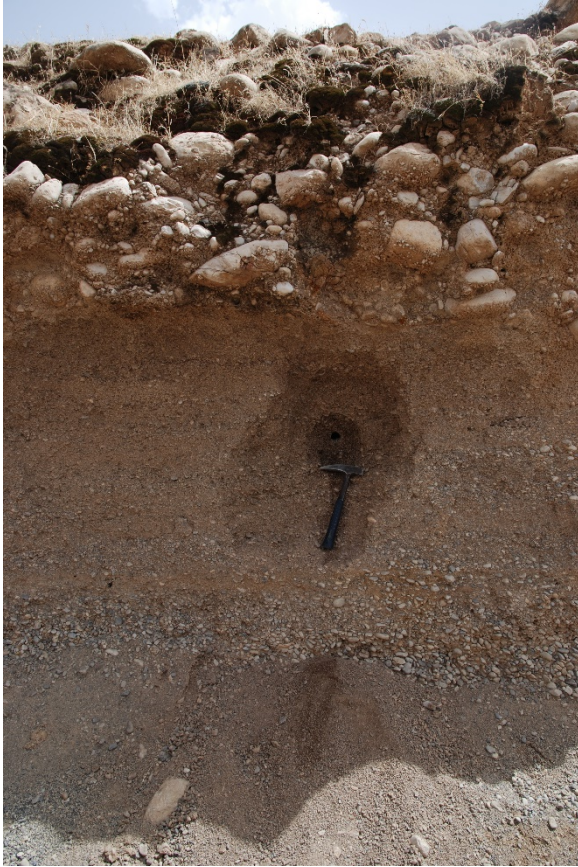

10 Estimate of burial moisture content:

**The one expected for an alluvial deposit in arid climate**

Elevation (meters above sea level)

**436 m a.s.l.**

Burial depth (meters from surface)

15 **~ 2 m**



Sample No. **SEY11**

Sample Location (lat. and long required, country, state, county optional)

**LAT: 32° 59.265'N; LONG: 47° 45.869'E – WESTERN IRAN**

Sample depositional environment (e.g. eolian-medium sand, alluvial fan):

5 **SANDY-GRAVELLY-CONGLOMERATIC ALLUVIAL PLAIN DEPOSIT. WE SAMPLED A SANDY LAYER**

Stratigraphic and/or geomorphic context, sketch below (or attach photo):

**TERRACED ALLUVIAL DEPOSIT (LEVEL 4 OF 4 - same sequence as SEY3 and SEY10)**

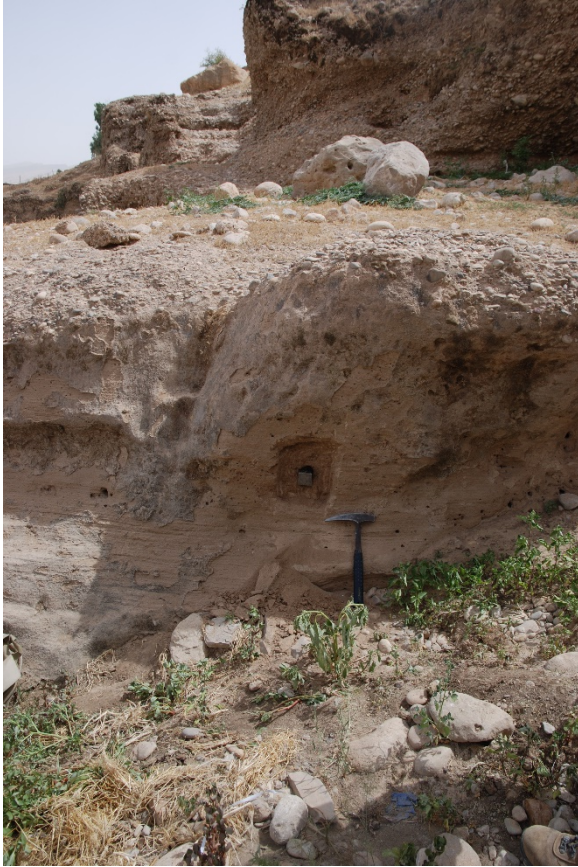

10 Estimate of burial moisture content:

**The one expected for an alluvial deposit in arid climate**

Elevation (meters above sea level)

**400 m a.s.l.**

Burial depth (meters from surface)

15 **~ 1 m**
